# Supplementary material for: Control of cell death/survival balance by the MET dependence receptor
Source: eLife. 2020 Feb 24;9:e50041. doi: 10.7554/eLife.50041 (PMC7039684; doi:10.7554/eLife.50041)
Supplement: Figure 1—source data 1. [file elife-50041-fig1-data1.xlsx]

## Sheet: Figure 1b
	GFP				GFP-p40MET				GFP-p40MET D1374N				flag-p40MET
	nb cells+	CytC releasing			nb cells+	CytC releasing			nb cells+	CytC releasing			nb cells+	CytC releasing
Slide 1	242	8	3.30579		161	47	29.1925		145	7	4.82759		157	52	33.121
Slide 2	249	9	3.61446		206	54	26.2136		177	26	14.6893		174	47	27.0115
Slide 3	224	14	6.25		188	48	25.5319		189	16	8.46561		117	35	29.9145
Slide 4	379	32	8.44327		315	85	26.9841		128	19	14.8438		155	32	20.6452
Slide 5	369	45	12.1951		337	89	26.4095		154	25	16.2338		153	33	21.5686
Slide 6	422	40	9.47867		258	75	29.0698		147	18	12.2449		175	43	24.5714
total	1885	148			1465	398			940	111			931	242
Mean %CytC+			7.21455				27.2336				11.8841				26.1387
SD			3.48171				1.54185				4.40815				4.84339
		GFP	GFP-p40MET	GFP-p40MET D1374N	flag-p40MET
	% CytC +	7.21455	27.2336	11.8841	26.1387
	ecart type	3.48171	1.54185	4.40815	4.84339
	T Test analysis
		3.30579	29.1925	4.82759	33.121
		3.61446	26.2136	14.6893	27.0115
		6.25	25.5319	8.46561	29.9145
		8.44327	26.9841	14.8438	20.6452
		12.1951	26.4095	16.2338	21.5686
		9.47867	29.0698	12.2449	24.5714
	GFP/GFP-p40MET		7.5003e-08	***
	GFP-p40MET/GFP-p40MET D1374N		5.56852e-06	***
	GFP-p40MET/flag-P40met		0.304633	NS

## Sheet: Figure 1c
	GFP				GFP-p40MET				GFP-p40MET D1374N
	nb cells+	casp 3+			nb cells+	casp 3+			nb cells+	casp 3+
Slide 1	1518	148	9.74967		1014	186	18.3432		577	66	11.4385
Slide 2	895	72	8.04469		794	122	15.3652		969	126	13.0031
Slide 3	1491	176	11.8042		757	133	17.5694		477	60	12.5786
Slide 4	661	26	3.93343		367	44	11.9891		248	19	7.66129
Slide 5	864	47	5.43981		475	47	9.89474		205	13	6.34146
Slide 6	616	44	7.14286		650	61	9.38462		251	11	4.38247
total	6045	513			4057	593			2727	295
Mean %casp3+			7.68577				13.7577				9.23424
SD			2.85548				3.88108				3.59527
		GFP	GFP-p40MET	GFP-p40MET D1374N
	% Casp3 +	7.68577	13.7577	9.23424
	ecart type	2.85548	3.88108	3.59527
	T Test analysis
		9.74967	18.3432	11.4385
		8.04469	15.3652	13.0031
		11.8042	17.5694	12.5786
		3.93343	11.9891	7.66129
		5.43981	9.89474	6.34146
		7.14286	9.38462	4.38247
	GFP/GFP-p40MET		0.00575358	**
	GFP-p40MET/GFP-p40MET D1374N		0.0313331	*

## Sheet: Figure 1d
	GFP				GFP-p40MET				GFP-p40MET D1374N
	nb cells+	casp 3+			nb cells+	casp 3+			nb cells+	casp 3+
Slide 1	59	10	16.9492		53	22	41.5094
Slide 2	70	5	7.14286		63	28	44.4444		71	14	19.7183
Slide 3	70	9	12.8571		64	30	46.875		74	12	16.2162
Slide 4	63	14	22.2222		56	20	35.7143		68	13	19.1176
total	262	38			236	100			213	39
Mean %casp3+			14.7928				42.1358				18.3507
SD			6.38004				4.81034				1.87278
		GFP	GFP-p40MET	GFP-p40MET D1374N
	% Casp3 +	14.7928	42.1358	18.3507
	ecart type	6.38004	4.81034	1.87278
	T Test analysis
		16.9492	41.5094	19.7183
		7.14286	44.4444	16.2162
		12.8571	46.875	19.1176
		22.2222	35.7143
	GFP/GFP-p40MET		0.000239206	***
	GFP/GFP-p40MET D1374N		0.000251555	***

## Sheet: Figure 1e
			Mander's Coefficients (using threshold)						Mander's Coefficients (using threshold)						Mander's Coefficients (using threshold)
GFP			Red fraction colocated with green	Green fraction colocated with red		GFP-p40MET			Red fraction colocated with green	Green fraction colocated with red		GFP-p40MET D1374N			Red fraction colocated with green	Green fraction colocated with red		Green = GFP Red = Facl4 (MAM marker)
LD244	1	1	0.452	0.257		LD204	1	1	0.851	0.615		LD344	1	1	0.624	0.544
	2	1	0.704	0.506				2	0.717	0.644			2	1	0.793	0.44
	3	1	0.691	0.341			2	1	0.773	0.672			4	1	0.62	0.636
	4	1	0.613	0.489			3	1	0.745	0.498			6	1	0.689	0.649
	5	1	0.445	0.062			4	1	0.925	0.694			7	1	0.713	0.637
	10	1	0.537	0.112			7	1	0.457	0.835			8	1	0.792	0.633
		2	0.872	0.36			12	1	0.63	0.887			9	1	0.716	0.509
	9	1	0.644	0.203			17	1	0.508	0.914				2	0.691	0.567
		2	0.502	0.53				2	0.828	0.654			10	1	0.66	0.644
	8	1	0.927	0.35			1	1	0.561	0.649				2	0.839	0.643
	7	1	0.523	0.404			2	1	0.526	0.463			11	1	0.666	0.547
	6	1	0.758	0.428		LD244	5	1	0.524	0.536				2	0.674	0.431
		2	0.641	0.136			6	1	0.537	0.459			12	2	0.756	0.467
	12	1	0.578	0.4			8	1	0.567	0.426			13	2	0.611	0.463
	13	1	0.913	0.417				2	0.684	0.554				3	0.638	0.506
	14	1	0.879	0.343			9	1	0.538	0.757			14	2	0.706	0.599
	15	1	0.847	0.316			10	1	0.667	0.408			15	1	0.795	0.456
	15	2	0.843	0.349			11	1	0.551	0.541				2	0.524	0.541
	16	1	0.728	0.322			12	1	0.768	0.561			16	1	0.875	0.585
LD344	3	1	0.854	0.462				2	0.833	0.635				2	0.744	0.568
	4	1	0.659	0.458				3	0.799	0.642				3	0.661	0.59
		2	0.881	0.144			13	1	0.606	0.535		LD244	1	1	0.799	0.713
	6	1	0.782	0.248			15	1	0.618	0.532			2	1	0.778	0.653			Green fraction colocated with red
	7	2	0.921	0.434				2	0.678	0.532				2	0.796	0.655		GFP-p40MET/GFP	4.76698e-10	***
	8	1	0.93	0.497			1	1	0.453	0.493			3	1	0.74	0.546		GFP-p40MET/GFP-p40MET D1374N	0.168924	NS
	9	1	0.641	0.132				2	0.57	0.547			4	1	0.667	0.518
		2	0.661	0.094		LD344	3	1	0.568	0.451			5	1	0.752	0.527
	10	1	0.847	0.582			4	1	0.773	0.524			6	1	0.74	0.764
		2	0.626	0.524			5	1	0.493	0.686				2	0.726	0.504
	11	1	0.581	0.258				2	0.483	0.569			7	1	0.827	0.573
		Mean	0.716	0.3386				Mean	0.641033	0.5971				Mean	0.7204	0.570267
		SD	0.148629	0.143445				SD	0.130043	0.126035				SD	0.0770505	0.0804504
			n=30	n=30					n=30	n=30					n=30	n=30

## Sheet: Figure 1-Figure Supplement 1d
		control												ZVAD
	Field	GFP	CytC+GFP		Field	GFP-p40MET	CytC+p40GFP		Field	GFP-p40MET D1374N	CytC+p40METD1374N-GFP		Field	GFP	CytC+GFP		Field	GFP-p40MET	CytC+p40GFP		Field	GFP-p40MET D1374N	CytC+p40MET D1374N-GFP
Slide 1	1	6	0		1	4	2		1	7	2		1	5	1		1	5	3		1	6	0
	2	7	1		2	4	2		2	5	1		2	4	1		2	4	0		2	5	1
	3	12	1		3	6	1		3	4	1		3	9	1		3	4	3		3	6	1
	4	15	1		4	11	2		4	5	0		4	6	0		4	5	2		4	4	0
	5	5	0		5	5	1		5	4	0		5	8	0		5	11	4		5	6	0
	6	7	0		6	6	0		6	7	1		6	5	0		6	5	2		6	9	1
	7	9	1		7	7	2		7	6	0		7	8	0		7	4	0		7	11	1
	8	6	0		8	9	2		8	6	0		8	6	1		8	6	2		8	6	0
	9	5	1		9	7	1		9	8	1		9	4	0		9	10	2		9	6	1
	10	8	1	7.5	10	5	2	23.4375	10	6	0	10.3448	10	6	0	6.55738	10	8	3	33.871	10	9	2	10.2941
Slide 2	11	8	0		11	9	2		11	5	1		11	7	0		11	6	1		11	10	1
	12	15	0		12	6	1		12	7	2		12	7	0		12	7	2		12	4	0
	13	6	0		13	7	1		13	7	1		13	7	0		13	4	1		13	10	0
	14	11	1		14	5	3		14	7	0		14	9	1		14	5	0		14	11	0
	15	13	0		15	6	1		15	6	0		15	5	0		15	5	2		15	12	2
	16	11	0		16	5	1		16	9	0		16	8	0		16	6	2		16	11	1
	17	7	1		17	6	2		17	4	1		17	8	1		17	4	1		17	5	1
	18	5	1		18	6	1		18	9	0		18	6	0		18	7	2		18	9	0
	19	8	1		19	7	0		19	5	1		19	5	1		19	6	3		19	12	0
	20	7	1	5.49451	20	7	0	18.75	20	5	1	10.9375	20	5	2	7.46269	20	8	2	27.5862	20	14	0	5.10204
Slide 3	21	5	2		21	5	1		21	5	1		21	5	1		21	5	1		21	10	1
	22	8	1		22	7	1		22	4	0		22	4	0		22	7	2		22	5	1
	23	5	2		23	4	1		23	6	0		23	9	1		23	5	2		23	5	1
	24	6	1		24	4	2		24	5	1		24	8	0		24	10	3		24	7	0
	25	7	0		25	5	1		25	8	0		25	13	1		25	7	1		25	8	0
	26	7	1		26	7	1		26	4	1		26	6	0		26	11	3		26	7	2
	27	5	0		27	8	2		27	7	0		27	5	1		27	4	1		27	5	0
	28	5	0		28	7	1		28	14	2		28	3	0		28	5	3		28	6	0
	29	5	0		29	7	2		29	8	1		29	4	0		29	6	3		29	8	2
	30	4	0	12.2807	30	7	2	22.9508	30	5	0	9.09091	30	7	1	7.8125	30	7	3	32.8358	30	4	0	10.7692
	Total	228	18			189	41			188	19			192	14			187	59			231	19
	Mean of of CytoC+			8.42507				21.7128				10.1244				7.27752				31.431				8.7218
	SD			2.84663				2.1044				0.76981				0.528865				2.75133				2.56689
		GFP		GFP-p40MET		GFP-p40MET D1374N
		Control	ZVAD	Control	ZVAD	Control	ZVAD
	Mean % of CytoC+	8.42507	7.27752	21.7128	31.431	10.1244	8.7218
	SD	2.84663	0.528865	2.1044	2.75133	0.76981	2.56689
																		moyenne	SD
											CTL	7.5	5.49	12.2807				8.42357	2.46659
											CTL P40	23.4375	18.75	22.9508				21.7128	2.1044
											CTL P40 D1374N	10.3448	10.9375	9.09091				10.1244	0.76981
										+ZVAD	CTL	6.55738	7.46269	7.8125				7.27752	0.528865
											CTL P40	33.871	27.5862	32.8358				31.431	2.75133
											CTL P40 D1374N	10.2941	5.10204	10.7692				8.7218	2.56689
										T-TEST		ZVAD
											CTL	0.302838	ns
											CTL P40	0.00828504	**
											CTL P40 D1374N	0.250137	ns
												CTL P40
											CTL	0.00302908	**
											CTL P40 D1374N	0.000929592	***
												CTL p40MET+ ZVAD
											CTL+ZVAD	0.000129896	**
											CTL P40 D1374N+ZVAD	0.000517091	***
