# Supplementary material for: Control of cell death/survival balance by the MET dependence receptor
Source: eLife. 2020 Feb 24;9:e50041. doi: 10.7554/eLife.50041 (PMC7039684; doi:10.7554/eLife.50041)
Supplement: Figure 2—figure supplement 1—source data 1. [file elife-50041-fig2-figsupp1-data1.xlsx]

## Sheet: Figure 2-figure supplement 1b
		Si Control								Si BAK								Si BAX								Si BOK
	Field	GFP	Casp3+GFP		Field	GFP-p40MET	Casp3+p40GFP		Field	GFP	Casp3+GFP		Field	GFP-p40MET	Casp3+p40GFP		Field	GFP	Casp3+GFP		Field	GFP-p40MET	Casp3+p40GFP		Field	GFP	C-3+GFP		Field	GFP-p40MET	Casp3+p40GFP
Slide 1	1	13	0		1	9	3		1	20	0		1	14	0		1	11	0		1	14	2		1	16	0		1	9	1
	2	18	2		2	11	3		2	24	3		2	13	0		2	17	0		2	25	8		2	11	2		2	15	1
	3	18	1		3	11	5		3	17	0		3	24	1		3	8	0		3	20	4		3	13	1		3	25	4
	4	11	0		4	15	3		4	9	0		4	5	0		4	5	1		4	18	4		4	9	0		4	17	2
	5	16	0		5	18	4		5	10	1		5	28	1		5	6	0		5	15	5		5	17	1		5	17	3
	6	14	0		6	13	3		6	10	0		6	27	4		6	8	1		6	32	5		6	23	0		6	19	1
	7	15	1		7	19	5		7	19	1		7	25	2		7	20	0		7	34	6		7	33	1		7	8	1
	8	13	1		8	14	5		8	26	2		8	25	3		8	8	1		8	17	6		8	15	3		8	10	0
	9	16	1		9	22	4		9	15	1		9	11	1		9	9	1		9	24	6		9	17	0		9	10	1
	10	18	0	3.94737	10	20	4	25.6579	10	12	0	4.93827	10	14	1	6.98925	10	17	1	4.58716	10	19	5	23.3945	10	21	0	4.57143	10	5	1	11.1111
Slide 2	11	11	1		11	13	4		11	13	2		11	17	3		11	4	1		11	22	4		11	15	1		11	10	3
	12	21	2		12	16	4		12	12	1		12	32	5		12	3	1		12	20	5		12	18	0		12	15	0
	13	9	0		13	22	6		13	12	1		13	22	0		13	7	0		13	23	7		13	18	2		13	25	5
	14	17	1		14	21	4		14	13	1		14	37	0		14	14	1		14	22	4		14	24	2		14	25	0
	15	9	1		15	14	5		15	11	0		15	29	3		15	17	1		15	20	8		15	25	1		15	10	3
	16	10	0		16	25	4		16	6	0		16	12	1		16	30	2		16	27	7		16	21	1		16	14	2
	17	15	0		17	13	4		17	13	0		17	10	0		17	22	1		17	28	9		17	21	2		17	8	0
	18	15	1		18	22	7		18	7	0		18	24	3		18	23	0		18	16	6		18	8	1		18	6	3
	19	16	0		19	15	3		19	7	0		19	11	0		19	18	1		19	7	2		19	15	0		19	9	5
	20	6	0	4.65116	20	28	10	26.9841	20	8	1	5.88235	20	7	0	7.46269	20	21	1	5.66038	20	9	4	28.866	20	9	0	5.74713	20	4	0	16.6667
Slide 3	21	21	0		21	25	3		21	11	0		21	6	2		21	13	1		21	22	5		21	15	1		21	13	3
	22	15	0		22	19	5		22	10	2		22	30	2		22	7	0		22	16	4		22	16	0		22	16	3
	23	14	0		23	16	5		23	13	1		23	15	1		23	12	0		23	14	4		23	19	2		23	8	2
	24	16	1		24	21	7		24	11	1		24	17	0		24	14	1		24	15	2		24	26	3		24	10	0
	25	21	1		25	22	6		25	12	0		25	19	0		25	22	1		25	4	2		25	13	0		25	9	1
	26	25	0		26	14	6		26	21	1		26	32	4		26	14	0		26	5	0		26	13	0		26	6	0
	27	19	1		27	19	5		27	24	2		27	21	0		27	17	1		27	15	4		27	15	2		27	6	0
	28	13	0		28	25	7		28	7	0		28	25	5		28	21	0		28	15	3		28	7	0		28	10	4
	29	11	1		29	16	2		29	4	0		29	14	1		29	18	0		29	10	2		29	9	0		29	18	2
	30	25	2	3.33333	30	18	4	25.641	30	10	0	5.69106	30	19	2	8.58586	30	19	2	3.82166	30	8	1	21.7742	30	14	0	5.44218	30	9	1	15.2381
	Total Counting	461	18			536	140			387	21			585	45			425	20			536	134			496	26			366	52
	Mean of % casp3+			3.97729				26.0943				5.50389				7.67926				4.68973				24.6782				5.25358				14.3386
	SD			0.538417				0.629206				0.407509				0.669563				0.754151				3.03417				0.498159				2.35554
		siCTL		siBAK		siBAX		siBOK
		GFP	GFP-p40MET	GFP	GFP-p40MET	GFP	GFP-p40MET	GFP	GFP-p40MET
	Mean	3.97729	26.0943	5.50389	7.67926	4.68973	24.6782	5.25358	14.3386
	SD	0.538417	0.629206	0.407509	0.669563	0.754151	3.03417	0.498159	2.35554
											T Test analysis
											GFP	Si CTL	3.94737	4.65116	3.33333
												Si BAK	4.93827	5.88235	5.69106
												Si BAX	4.58716	5.66038	3.82166
												Si BOK	4.57143	5.74713	5.44218
											GFP-p40MET	Si CTL	25.6579	26.9841	25.641
												Si BAK	6.98925	7.46269	8.58586
												Si BAX	23.3945	28.866	21.7742
												Si BOK	11.1111	16.6667	15.2381
												GFP-p40MET
										Si CT -GFP/GFPp40MET		1.46727e-06	***
										Si BAK-GFP/GFPp40MET		0.00858818	ns
										Si BAX-GFP/GFPp40MET		0.000414532	***
										Si BOX-GFP/GFPp40MET		0.00296976	**

## Sheet: Figure 2-figure supplement 1c
		Si Control + ZVAD								Si BAK + ZVAD								Si BAX + ZVAD								Si BOK + ZVAD
	Field	GFP	CytC+GFP		Field	GFP-p40MET	CytC+p40GFP		Field	GFP	CytC+GFP		Field	GFP-p40MET	CytC+p40GFP		Field	GFP	CytC+GFP		Field	GFP-p40MET	CytC+p40GFP		Field	GFP	CytC+GFP		Field	GFP-p40MET	CytC+p40GFP
Slide 1	1	3	0		1	9	2		1	7	0		1	6	1		1	15	1		1	16	5		1	11	1		1	27	7
	2	17	0		2	7	2		2	11	0		2	9	0		2	7	2		2	13	2		2	10	0		2	9	3
	3	15	2		3	18	11		3	8	1		3	8	1		3	13	2		3	12	3		3	17	2		3	9	1
	4	16	1		4	15	4		4	13	0		4	9	1		4	9	0		4	16	4		4	9	0		4	11	2
	5	10	0		5	10	4		5	11	0		5	16	1		5	11	1		5	7	3		5	10	2		5	14	2
	6	16	0		6	8	2		6	9	1		6	17	1		6	15	0		6	14	5		6	8	0		6	18	4
	7	15	0		7	21	6		7	10	1		7	15	2		7	12	0		7	9	1		7	9	0		7	16	3
	8	12	1		8	10	2		8	15	1		8	8	0		8	14	0		8	10	3		8	11	0		8	14	1
	9	12	0		9	13	4		9	6	1		9	15	2		9	13	1		9	13	4		9	16	1		9	14	2
	10	9	0	3.2	10	23	5	31.3433	10	7	1	6.18557	10	9	0	8.03571	10	10	0	5.88235	10	15	3	26.4	10	10	0	5.40541	10	15	2	18.3673
Slide 2	11	14	0		11	14	4		11	4	0		11	6	0		11	10	2		11	9	2		11	8	0		11	8	2
	12	12	0		12	12	3		12	14	0		12	7	1		12	15	1		12	24	5		12	14	0		12	12	1
	13	8	2		13	10	4		13	8	1		13	7	0		13	9	1		13	12	3		13	15	1		13	10	2
	14	12	1		14	11	5		14	10	2		14	9	2		14	12	0		14	17	6		14	14	1		14	13	2
	15	10	0		15	10	2		15	9	1		15	10	1		15	12	1		15	10	2		15	10	1		15	9	0
	16	9	1		16	13	4		16	7	0		16	15	1		16	15	1		16	13	2		16	12	0		16	10	1
	17	7	1		17	22	5		17	6	0		17	9	1		17	13	0		17	7	1		17	19	0		17	16	3
	18	7	1		18	18	4		18	6	1		18	13	1		18	11	0		18	10	1		18	12	0		18	9	1
	19	9	1		19	23	5		19	8	1		19	13	2		19	18	0		19	5	1		19	9	0		19	10	0
	20	11	1	8.08081	20	13	4	27.3973	20	7	0	7.59494	20	11	0	9	20	10	1	5.6	20	8	2	21.7391	20	13	1	3.1746	20	9	1	12.2642
Slide 3	21	19	2		21	7	3		21	6	0		21	10	1		21	8	1		21	12	2		21	17	0		21	15	4
	22	9	0		22	13	4		22	10	1		22	8	1		22	10	1		22	5	1		22	7	1		22	15	3
	23	10	1		23	16	4		23	8	0		23	8	0		23	5	0		23	27	9		23	10	0		23	7	1
	24	5	0		24	32	13		24	8	1		24	5	0		24	12	0		24	11	2		24	14	0		24	13	2
	25	12	1		25	11	3		25	17	2		25	14	2		25	8	1		25	14	3		25	12	1		25	9	2
	26	6	0		26	10	3		26	13	0		26	7	1		26	13	2		26	9	1		26	9	0		26	14	2
	27	7	1		27	20	7		27	14	0		27	9	1		27	9	0		27	13	2		27	11	1		27	21	4
	28	11	0		28	19	3		28	13	0		28	10	2		28	10	1		28	13	3		28	10	0		28	13	3
	29	12	1		29	18	3		29	15	1		29	11	1		29	10	0		29	7	2		29	8	1		29	13	0
	30	15	0	5.66038	30	14	4	29.375	30	7	0	4.5045	30	15	0	9.27835	30	7	0	6.52174	30	8	2	22.6891	30	15	0	3.53982	30	10	2	17.6923
Total counting		330	18			440	129			287	17			309	27			336	20			359	85			350	14			383	63
Meanof %CytC+				5.64706				29.3718				6.095				8.77135				6.00136				23.6094				4.03994				16.1079
SD				1.9926				1.61096				1.26329				0.532444				0.385593				2.011				0.976972				2.7319
		siCTL		siBAK		siBAX		siBOK
		GFP	GFP-p40MET	GFP	GFP-p40MET	GFP	GFP-p40MET	GFP	GFP-p40MET
	Mean	5.64706	29.3718	6.095	8.77135	6.00136	23.6094	4.03994	16.1079
	SD	1.9926	1.61096	1.26329	0.532444	0.385593	2.011	0.976972	2.7319
											T Test analysis
											GFP	Si CTL	3.2	8.08081	5.66038
												Si BAK	6.18557	7.59494	4.5045
												Si BAX	5.88235	5.6	6.52174
												Si BOK	5.40541	3.1746	3.53982
											GFP-p40MET	Si CTL	31.3433	27.3973	29.375
												Si BAK	8.03571	9	9.27835
												Si BAX	26.4	21.7391	22.6891
												Si BOK	18.3673	12.2642	17.6923
												GFP-p40MET
										Si CTL-GFP/GFP-p40MET		9.81992e-05	***
										Si BAK-GFP/GFP-p40MET		0.0254015	ns
										Si BAX-GFP/GFP-p40MET		0.000131189	***
										Si BOK-GFP/GFP-p40MET		0.00208714	**
