# Supplementary material for: Control of cell death/survival balance by the MET dependence receptor
Source: eLife. 2020 Feb 24;9:e50041. doi: 10.7554/eLife.50041 (PMC7039684; doi:10.7554/eLife.50041)
Supplement: Figure 2—figure supplement 2—source data 1. [file elife-50041-fig2-figsupp2-data1.xlsx]

## Sheet: Figure 2-figure supplement 2b
		Si Control								Si BAK								Si BAX								Si BOK
	Field	GFP	Casp3+GFP		Field	GFP-p40MET	Casp3+p40GFP		Field	GFP	Casp3+GFP		Field	GFP-p40MET	Casp3+p40GFP		Field	GFP	Casp3+GFP		Field	GFP-p40MET	Casp3+p40GFP		Field	GFP	Casp3+GFP			GFP-p40MET	Casp3+p40GFP
Slide 1	1	5	0		1	5	1		1	5	0		1	5	0		1	5	0		1	4	2		1	3	0		1	5	1
	2	6	1		2	6	2		2	3	0		2	3	1		2	6	1		2	4	1		2	7	1		2	6	0
	3	5	0		3	6	2		3	4	1		3	4	1		3	4	0		3	5	2		3	4	1		3	7	2
	4	6	0		4	7	3		4	4	0		4	5	1		4	5	0		4	3	1		4	3	0		4	6	1
	5	6	0		5	6	3		5	7	0		5	5	0		5	5	0		5	6	3		5	3	0		5	5	0
	6	6	0		6	9	4		6	4	0		6	3	1		6	6	0		6	3	1		6	3	0		6	8	1
	7	5	1		7	4	2		7	3	0		7	6	0		7	8	1		7	6	2		7	4	1		7	6	2
	8	7	1		8	6	2		8	5	1		8	7	0		8	5	0		8	5	1		8	5	0		8	10	3
	9	7	0		9	4	1		9	3	0		9	4	1		9	9	2		9	4	1		9	5	0		9	8	3
	10	6	1	6.77966	10	5	2	37.931	10	8	1	6.52174	10	4	1	13.0435	10	4	0	7.01754	10	5	2	35.5556	10	6	0	6.97674	10	6	3	23.8806
Slide 2	11	4	1		11	4	1		11	4	0		11	4	1		11	13	1		11	8	2		11	4	1		11	7	3
	12	4	0		12	6	2		12	4	0		12	6	0		12	7	1		12	5	2		12	6	0		12	6	2
	13	5	0		13	3	1		13	3	0		13	3	0		13	8	0		13	4	2		13	6	0		13	5	0
	14	8	0		14	4	2		14	4	1		14	5	1		14	19	1		14	6	3		14	7	1		14	8	1
	15	7	1		15	5	2		15	5	0		15	6	0		15	11	2		15	4	1		15	3	0		15	7	2
	16	5	0		16	10	4		16	7	3		16	3	1		16	4	0		16	4	1		16	5	0		16	10	2
	17	8	1		17	6	2		17	8	1		17	4	1		17	6	1		17	4	2		17	6	0		17	7	0
	18	11	0		18	5	2		18	3	0		18	5	1		18	5	0		18	3	1		18	8	1		18	10	2
	19	5	0		19	5	1		19	6	0		19	3	0		19	6	1		19	4	2		19	5	0		19	6	2
	20	9	1	6.06061	20	4	1	34.6154	20	4	0	10.4167	20	4	1	13.9535	20	9	0	7.95455	20	5	2	38.2979	20	9	0	5.08475	20	5	0	19.7183
Slide 3	21	7	0		21	5	2		21	4	0		21	3	1		21	5	0		21	6	2		21	9	1		21	6	2
	22	5	1		22	4	1		22	8	1		22	3	0		22	4	0		22	10	4		22	7	2		22	5	0
	23	6	0		23	3	2		23	8	0		23	4	0		23	7	1		23	5	2		23	8	0		23	12	3
	24	6	1		24	6	3		24	3	0		24	6	1		24	6	0		24	4	1		24	10	0		24	5	1
	25	7	0		25	5	1		25	4	1		25	8	1		25	7	0		25	6	2		25	10	2		25	4	2
	26	3	0		26	4	2		26	4	0		26	4	1		26	5	2		26	7	3		26	9	1		26	6	1
	27	9	0		27	4	0		27	7	1		27	3	1		27	4	0		27	6	2		27	7	0		27	6	0
	28	4	1		28	8	3		28	5	1		28	3	0		28	6	0		28	4	2		28	12	1		28	5	1
	29	5	0		29	4	2		29	4	0		29	4	0		29	4	0		29	5	2		29	13	0		29	4	1
	30	6	1	6.89655	30	8	2	35.2941	30	5	1	9.61538	30	5	0	11.6279	30	7	0	5.45455	30	6	2	37.2881	30	5	1	8.88889	30	14	4	22.3881
	Total counting	183	12			161	58			146	13			132	17			200	14			151	56			192	14			205	45
	Mean of % casp3+			6.57894				35.9468				8.85126				12.875				6.80888				37.0472				6.98346				21.9957
	SD			0.369611				1.43013				1.67939				0.956863				1.03123				1.13244				1.55304				1.72175
		siCTL		siBAK		siBAX		siBOK
		GFP	GFP-p40MET	GFP	GFP-p40MET	GFP	GFP-p40MET	GFP	GFP-p40MET
	Mean of % casp3+	6.57894	35.9468	8.85126	12.875	6.80888	37.0472	6.98346	21.9957
	SD	0.369611	1.43013	1.67939	0.956863	1.03123	1.13244	1.55304	1.72175
											T Test analysis
											GFP	Si CTL	6.77966	6.06061	6.89655
												Si BAK	6.52174	10.4167	9.61538
												Si BAX	7.01754	7.95455	5.45455
												Si BOK	6.97674	5.08475	8.88889
											GFP-p40MET	Si CTL	37.931	34.6154	35.2941
												Si BAK	13.0435	13.9535	11.6279
												Si BAX	35.5556	38.2979	37.2881
												Si BOK	23.8806	19.7183	22.3881
												GFP-p40MET
										Si CTL-GFP/GFP-p40MET		4.75974e-06	***
										Si BAK-GFP/GFP-p40MET		0.02111	ns
										Si BAX-GFP/GFP-p40MET		4.8947e-06	***
										Si BOK-GFP/GFP-p40MET		0.000394905	**
