# Supplementary material for: Control of cell death/survival balance by the MET dependence receptor
Source: eLife. 2020 Feb 24;9:e50041. doi: 10.7554/eLife.50041 (PMC7039684; doi:10.7554/eLife.50041)
Supplement: Figure 2—figure supplement 4—source data 1. [file elife-50041-fig2-figsupp4-data1.xlsx]

## Sheet: Figure2-figure supplement4a-b-c
p40MET-mTurq 2 as a donor					BOK-mTurq 2 as a donor					BAX-mTurq 2 as a donor
P40 alone	P40+BAX	P40+BOK	P40+BAK		BOK alone	BOK+P40MET	BOK+BCL-XL	BOK+BAK		BAX alone	BAX+P40MET	BAX+BCL-XL	BAX+BAK
0.166093	1.10137	0.883392	4.43898		0.934962	0.245821	11.9761	0.518374		0.291575	1.57061	8.41583	6.69627
-0.713423	1.03547	0.650206	7.58218		0.247782	2.62803	15.4354	0.196028		0.31446	0.901848	5.6874	5.58855
-0.325625	1.51958	0.890996	4.96795		-0.80942	1.18141	10.6998	0.680857		-0.199186	1.0951	2.39447	9.31153
-0.0924394	0.683157	-1.34961	9.36588		3.05201	1.61645	9.72488	1.31507		-0.499237	1.21716	4.45414	6.80323
-0.510653	0.731315	0.941689	8.15971		1.64593	-0.0896278	9.84543	1.21024		0.487371	0.79505	5.04153	9.11799
-0.140597	0.743988	0.903669	3.83078		0.911175	2.04362	7.3977	3.09452		0.172063	0.995932	7.49025	9.55854
-0.249586	1.14446	0.229458	5.14172		1.34727	0.670374	13.614	4.5359		-0.674691	0.688252	4.64486	8.94229
0.176231	1.15206	0.237062	3.85122		-1.09222	0.140993	8.03453	3.41162		0.0906933	0.601797	5.07459	7.61811
0.0875192	0.475317	1.01266	8.65291		-1.19794	0.20389	9.57026	2.2821		-0.0949313	1.0595	2.47076	6.51547
-0.0442814	0.705968	1.16727	2.74829		-1.47546	1.30982	11.334	2.39217		-0.0415325	2.09697	5.23479	3.1108
0.59191	0.371397	0.807353	3.14475		-0.78299	-0.139421	17.8359	0.00995865		0.0856077	2.86235	4.87371	6.16402
0.457575	1.31428	1.34469	2.81142		-1.01293	0.906237	11.1348	0.140993		0.0678081	1.32904	6.15782	7.79499
-0.558811	0.918877	1.4182	5.08161		-0.94157	3.07093	18.0901	-0.482732		0.0804694	1.85794	5.15342	6.89655
0.852977	0.915173	0.822561	7.81138		-0.658768	0.743754	16.6619	0.418787		0.943733	5.56026	5.40007	2.79742
0.143281	1.59679	0.680622	7.61441		-0.336322	1.02941	13.0505	2.87176		-0.220018	8.33192	-0.112731	5.80158
0.292824	2.22052	1.19769	4.70535		0.168491	0.864306	14.3242	5.07314		-0.431377	8.44126	6.48585	2.28439
-0.132993	0.978106	1.038	6.3215		0.500029	0.395201	14.9139	8.29398		-0.13089	8.39549	6.87453	5.16093
-0.137835	0.897299	0.890996	7.95027		1.46969	0.455477	18.4649	10.4954		0.289282	8.48449	7.12409	2.73871
-0.247719	1.34174	0.143281	1.19275		0.623202	0.908857	13.8839	6.40184		-0.0137511	6.17054	4.99776	5.92664
-0.286051	0.773563	0.20204	4.75333		0.756857		14.1434	14.5443		-0.128344	5.41787	5.37464	6.20485
-0.286051	0.725583	0.232706	8.37703		0.720167			3.46404		0.317294	0.87642	7.0044
-0.559484	5.09676	0.557248	5.43009		0.342787					-0.706399	5.43058	6.59441
-0.0841701	6.53614	0.393699	6.10685		0.484305					-0.558973	4.08035	6.56386
0.207151	7.30381	0.828125	3.95283		-0.299284					-0.847393	5.36193	6.89999
-0.114836	2.39224	0.470362	6.3619		-0.972802					-0.638097	7.55762	5.38483
0.271037	1.20285	0.664577	8.56643		-0.430318					-0.740192	5.20177	7.24886
0.317035	4.13465	1.95763	8.19774		-0.695009					-0.102096	5.57952	7.50606
0.695242	8.28613	1.41588	1.66749		0.775202					0.336915	4.51262	7.87021
-0.038172	8.11188	0.53936	6.51846		-1.55722					0.62023	3.46104	5.7286
0.319591	3.81647	0.14582			-0.43818					1.92961	3.72904	7.68432
0.0257142	6.38463	0.0691568			-1.27942						4.58154	7.66649
-0.14039	6.54372	0.0896004									6.23548	7.4424
0.058935		0.639022									5.49529	6.32449
0.0589221		0.0538241									3.9511	6.04692
-0.569861		1.21911									5.17114	9.63748
-0.319863		0.273593									4.18592	5.91195
-0.516831		0.0436024									8.58623	4.75075
0.129629		1.95271									11.1999	5.33135
0.0437707		1.82239									3.61673	5.44169
0.220537		0.928029									2.51921	2.3482
0.212961		2.29257									5.73777	0.581944
0.321546		2.56854										1.54419
-0.158248		3.07194										1.04393
-0.0572386		3.3198										0.778478
-0.595113		1.7074										2.49879
0.836693		1.59752										1.61566
0.521039		1.48509										4.77297
-0.127945		-0.814693										3.22622
		-0.17331										2.49879
		0.355639										3.69075
		0.948471										2.47071
		-0.0123256										1.96789
		1.58219										1.57738
		2.28745										4.7066
		-0.589826										1.45741
		0.199765										2.41966
		-0.260191										2.74637
		2.06226										3.29258
		2.33888
		2.84347
		3.09191
		1.47571
		1.36558
		1.25288
		-1.05232
		-0.409429
		0.120767
		0.714996
		-0.248065
		1.35021
		2.05714
		-0.826927
		-0.0354745
		-0.496515
		-0.865347
		-0.849979
		-0.875592

## Sheet: Figure 2-figure supplement 4d-e
	bak alone	Bak + p40
	0.20212	6.00172
	0.451183	3.67629
	0.42831	6.4236
	0.415603	4.02193
	0.0826721	6.17708
	-0.0774396	6.06272
	0.171623	3.54668
	0.232618	6.2762
	-0.212137	3.60005
	0.108087	3.38656
	-0.407829	4.73099
	-0.125727	4.37011
	-0.029152	4.73354
	-0.875457	4.4921
	-0.341751	8.45423
	-0.186722	7.40715
	0.163999	5.4121
		5.04359
		3.77032
		2.75882
	p40	p40+bak
	0.0629169	5.50474
	0.758626	4.89599
	-0.369266	0.368607
	-0.271762	0.587334
	-1.56304	0.24475
	1.51231	0.163057
	0.711192	2.83521
	-0.840978	0.771803
		2.98279
		1.95767
		3.61789
		-0.213786
		-0.622252
		-0.996459
		0.023388
