# Supplementary material for: Control of cell death/survival balance by the MET dependence receptor
Source: eLife. 2020 Feb 24;9:e50041. doi: 10.7554/eLife.50041 (PMC7039684; doi:10.7554/eLife.50041)
Supplement: Figure 2—figure supplement 5—source data 1. [file elife-50041-fig2-figsupp5-data1.xlsx]

## Sheet: Figure 2-figure supplement 5b
	GFP				GFP-p40MET				GFP-p40MET LD
	nb cells+	CytC released			nb cells+	CytC released			nb cells+	CytC released
Slide 1	715	31	4.33566		555	149	26.8468		621	48	7.72947
Slide 2	1097	79	7.20146		662	152	22.9607		446	15	3.36323
Slide 3	1170	117	10		910	249	27.3626		693	63	9.09091
total	2982	227			2127	550			1760	126
Mean %CytC+			7.17904				25.7234				6.72787
SD			2.83223				2.40641				2.99232
		GFP	GFP-p40MET	GFP-p40MET LD
	% CytC released	7.17904	25.7234	6.72787
	ecart type	2.83223	2.40641	2.99232
	T Test analysis
		4.33566	26.8468	7.72947
		7.20146	22.9607	3.36323
		10	27.3626	9.09091
	GFP/GFP-p40MET		0.000492907	***
	GFP-p40MET/GFP-p40MET LD		0.000509456	***

## Sheet: Figure 2-figure supplement 5c
	GFP				GFP-p40MET				GFP-p40MET LD
	nb cells+	casp 3+			nb cells+	casp 3+			nb cells+	casp 3+
Slide 1	2141	117	5.46474		1492	152	10.1877		1297	53	4.08635
Slide 2	1735	151	8.70317		685	138	20.146		337	19	5.63798
Slide 3	3904	396	10.1434		2565	441	17.193		2554	162	6.34299
total	7780	664			4742	731			4188	234
Mean %casp3+			8.10378				15.8422				5.35578
SD			2.39625				5.11473				1.15448
		GFP	GFP-p40MET	GFP-p40MET LD
	% Casp3 +	8.10378	15.8422	5.35578
	ecart type	2.39625	5.11473	1.15448
	T Test analysis
		5.46474	10.1877	4.08635
		8.70317	20.146	5.63798
		10.1434	17.193	6.34299
	GFP/GFP-p40MET		0.0382844	*
	GFP-p40MET/GFP-p40MET LD		0.0128622	*
