# Supplementary material for: Control of cell death/survival balance by the MET dependence receptor
Source: eLife. 2020 Feb 24;9:e50041. doi: 10.7554/eLife.50041 (PMC7039684; doi:10.7554/eLife.50041)
Supplement: Figure 2—source data 1. [file elife-50041-fig2-data1.xlsx]

## Sheet: Figure 2b-C
Fig2b							Fig2c
BAK	BAK+P40	BAK+BCLXL	BAK+free	BAK+IP3R			p40	p40+Bak	p40+BCLXL	p40+free	p40+IP3R
-0.831056	-0.537772	6.5166	-0.827458	-0.486053			0.452577	2.96473	1.13594	0.929229	-0.265706
-1.56044	0.505299	8.41872	-0.419312	-0.486053			-0.461818	0.172908	0.345573	1.70987	-0.720124
-0.876962	1.45401	10.1591	-0.991743	-0.914735			0.121838	2.64372	1.09946	1.43263	0.34183
-1.12944	3.57075	9.45063	-1.33572	-0.39621			0.880591	2.29839	0.795475	1.59071	0.359118
0.5155	3.02754	13.527	-0.873663	-1.71562			-0.172422	7.8261	1.13837	1.61259	-0.253358
1.84165	1.14797	4.29875	0.45602	-0.663173			0.0391536	3.79644	0.744405	1.49586	1.10989
2.02528	3.60646	6.43959	0.37131	-2.22645			-0.357246	7.06735	1.2697	0.909774	0.650537
-0.282743	3.05304	3.60567	0.232695	-0.912168			-0.456954	6.79984	0.756564	1.63205	1.2556
0.0462454	2.77506	4.85065	0.884701	-2.23158			0.112111	5.7371	0.822226	2.20598	0.0281832
0.416038	0.627713	10.7418	-0.532258	-1.48973			-0.15783	2.21814	1.89469	1.55423	0.403571
-0.129725	-0.51737	10.634	-1.33058	-2.15457			-0.275585	1.5518	2.02602	1.19917	0.462843
-0.680589	-0.984074	5.85946	0.353341	-1.20737			0.094864	4.78622	2.33	0.795475	0.312194
0.0921507	1.50246	3.35925	1.02075	-1.13293			-0.334857	5.17776	1.62232	1.598	0.114621
0.614961	0.711873	2.90746	1.40066	-0.25246			-0.650973	5.91219	0.924365	1.38643	-0.211374
-0.0608671	1.96917	10.0487	1.67532	-0.565629			-0.0113314	6.15782	1.27699	1.87037	1.13706
0.37131	3.1015	8.94494	2.0347	-1.62578			-0.591701	2.34216	1.5372	1.598	-0.466428
0.453453	3.0709	10.1232	-0.468084	-1.94152			1.6631	7.47834	1.16999	1.21619	-0.431681
0.5741	0.395636	2.84072	0.507359	0.407248			-0.112587	5.32854	2.38107	1.61503	0.369965
0.266065	5.74563	3.06918	1.19017	-0.552794			-0.564535	6.42532	1.2235	1.67096	0.297991
0.266065	3.74555	9.90755	-0.138324	-0.165184			-0.297812	7.01979	0.657946	1.67825	0.193752
-1.17913	5.03242	8.30129	-0.505264	0.0348091			0.593735	7.5236	1.42601	0.233165	0.992917
-0.406477	3.32176	8.90596	-0.595707	0.582634			0.356648	7.01732	0.835762	-0.0236797	0.893642
0.0401729	5.9782	8.58295	-0.435494	-1.73529			0.455434	3.32765	2.54724	-0.255828	0.975544
1.99619	6.17975	8.477	-0.887708	-0.815354			0.0849853	5.64419	0.793778	-0.495385	0.794366
0.702447	5.00917	16.436	0.156261	-1.94201			-0.171859	7.75575	1.20374	0.26527	0.320328
-1.4769	6.01179	10.9965	-0.758504	4.28304			-0.0483763	4.30069	0.899973	0.117091	1.32549
-0.195987	4.28045	10.627	0.660157	-0.639636			-0.189147	2.95226	0.650537	0.756733	0.337701
0.350775	5.04793	6.52602	0.62398	-0.352803			0.491577	5.59727	-0.147163	-0.129875	-0.183494
-0.16005	4.60863	5.89034	-0.164165	0.502528			0.240908	1.49022	0.136848	0.282558	0.0721399
0.224994	5.62676	5.29858	-0.476839	0.541289			0.325291	6.05415	0.527054	0.408511
-1.4615	4.02463	10.6761	-0.0582178	0.298385			-0.873456	1.56431	0.450495	0.875276
-0.360272	5.50789	12.1697	-0.0427133	0.463767			-1.53364	3.79194	0.620901	0.462843
-0.0650723	-0.892876	11.6787	-1.56215	-0.877372			-1.0596	0.813535	0.233165	-1.79936
0.106914	-0.833442	12.2937	-1.12286	-0.187422			-0.612858	0.514706	0.536933	0.218347
-0.0471036	3.82049	7.71212	1.16405	-0.797265			0.0969587	0.717218	2.23634	-1.55981
-0.0297929	-1.61383	9.43828	0.64982				0.523842	0.349239	1.29571	-1.26839
0.897892	-1.07893		0.639484				0.0895131	0.462843	1.33045	1.02022
0.251872	-0.44583						0.501505	0.373936	1.67543	2.96105
-2.15391	-1.20555						-0.463946	0.541872	1.11701	0.816703
-0.497512	-1.55182						0.816703	1.30563	2.5838	0.752175
-1.82315	-2.24693						0.712464	1.3379	1.91121	1.36272
-0.799849	1.19765						0.744729	1.45703	1.79705	0.928388
-1.74045	0.603307							1.00284	1.42725	1.65806
1.3682	4.79469							0.159006	0.973062	1.50915
0.673077	4.29338							1.53893	1.22125	1.39746
0.189854	3.81532							1.70522	1.35031	0.578443
-1.31408	-1.37093							1.79456	1.36023	0.685164
-0.45875	-0.5156							6.23216	1.59105	0.620635
3.29075	0.135588							7.25221	2.3778	1.02518
1.91085								8.71156	2.49693
-0.606043								8.87536
0.841043								10.5283
								2.38525
								2.02786
								2.62351
								4.36579
								6.22968
								3.18193
								4.75048
								4.93662
								5.73827
								7.69151
								6.87497
								2.85681
								3.57903
								5.75812

## Sheet: Figure 2d-e
Figure 2d						Figure 2e
Bak alone	Bak + p40wt	Bak + p40LD	Bak + free			p40wt	p40 wt + Bak		p40 LD	p40LD+Bak	p40LD+XL	p40 LD + free
0.357009	6.9447	0.448966	0.43364			-0.219197	6.38742		0.79224	-0.371458	1.88321	0.962782
0.438749	4.63045	0.239509	0.747826			0.254809	1.06283		0.528903	-0.0730098	1.49196	0.96529
-0.70305	2.1655	1.13864	0.00706205			-0.764427	7.45332		0.448648	0.0824843	0.679381	0.147692
-0.184515	0.477064	0.880653	-0.52169			-0.0841177	8.61009		0.270582	0.561507	1.35152	0.847415
-0.935496	0.459184	0.423423	-0.478266			0.136922	6.5618		-0.326315	2.81617	1.90578	0.436108
-0.0772318	5.83866	3.32007	-0.473157			0.419361	7.57858		0.777192	0.839891	1.82552	1.53209
0.558804	1.79256	1.85642	0.198639			-0.000613998	6.13445		-0.125677	0.546459	1.61987	2.29702
-0.600875	-0.135982	0.505162	-0.496147			-0.251125	3.08657		-0.449205	4.83258	1.29383	1.33898
-0.537016	0.183313	0.834674	-0.460386			-0.0399099	5.29696		-0.496857	5.93358	0.496299	2.1315
-0.273917	-0.148754	-0.764354	0.196085			0.0485058	8.39397		-0.175837	7.17753	0.438616	1.96597
0.313585	3.24088	0.254835	-1.35186			-0.6711	9.09392		0.157723	0.992877	0.684397	0.436108
-0.465494	0.226737	0.857664	-0.337776			0.436553	2.17539		-0.316283	-1.08121	-0.0328823	1.44682
-0.192178	5.0979	0.824457	-0.60343			-0.698116	5.69237		-0.281171	2.77855	0.518871	1.13332
0.479618	4.09915	2.3724	0.285487			0.463568	7.32561		-0.55454	2.86382	1.73022	0.634238
0.482173	3.6036	-0.317342	0.144997			0.262177	3.56057		-0.178345	-0.336347	0.80478	-0.248568
0.17565	3.04164	0.219074	-0.291798			0.706712	8.05013		0.0197851	-0.544508	1.3766	1.64997
1.16419	3.43501	-0.115547					2.63712		-0.158281	1.47692		0.867479
	0.106682	0.316139					0.834423		0.0674365	-0.411586		2.8262
	1.77979	-0.751583								-0.842957
	4.79393	-0.840985								1.48946
	6.46959	1.29957
	4.96763	1.18462
		2.52055
		1.2868
		1.00837
