# Supplementary material for: Control of cell death/survival balance by the MET dependence receptor
Source: eLife. 2020 Feb 24;9:e50041. doi: 10.7554/eLife.50041 (PMC7039684; doi:10.7554/eLife.50041)
Supplement: Figure 3—source data 1. [file elife-50041-fig3-data1.xlsx]

## Sheet: Figure 3a
% of CytchromeC releasing/transfected cells
	GFP		GFP-p40MET		GFP-p40MET D1374N
	GFP		GFP-p40MET		GFP-P40met D1374N
	control	Ca2+ free medium	control	Ca2+ free medium	control	Ca2+ free medium
Slide 1	1.53061	3.33333	12.2449	2.40964	4.29448	4.34783
Slide 2	3.11111	1.66667	21.6374	4.65116	4.54545	3.90625
Slide 3	3.125	4.25532	21.4876	7.61905	9.41176	4.46429
Slide 4	4.30108	1.20482	10.9589	4.33213	1.1976	2.5641
Slide 5	6.22951	3.33333	15.035	2.83019	3.80952	3.57143
Slide 6	3.26409	2.04778	10.951	2.07254	3.55556	4.23729
Mean	3.59357	2.64021	15.3858	3.98578	4.46906	3.84853
SD	1.42977	1.07459	4.57471	1.88164	2.46436	0.646717
						p40GFPc
					p40GFPx	0.000214689	***
						GFPc
					GFPx	0.130412	ns
						p40LMc
					p40LMx	0.298979	ns

## Sheet: Figure 3b
% of CytchromeC releasing/transfected cells
	GFP		GFP-p40MET		GFP-p40MET D1374N
	GFP		GFP-p40MET		GFP-MET D1374N
	control	BAPTA-AM	control	BAPTA-AM	control	BAPTA-AM
Slide 1	1.53061	3.33333	12.2449	8.69565	4.29448	9.85915
Slide 2	3.11111	2.63158	21.6374	11.6751	4.54545	9.7561
Slide 3	3.125	3.75	21.4876	10.2273	9.41176	6.43564
Slide 4	4.30108	6.17978	10.9589	8.09061	1.1976	5.36913
Slide 5	6.22951	4.60705	15.035	4.12371	3.80952	2.3569
Slide 6	3.26409	5.06329	10.951	5.30504	3.55556	2.20264
Mean	3.59357	4.26084	15.3858	8.01957	4.46906	5.99659
SD	1.42977	1.1706	4.57471	2.62188	2.46436	3.0898
						p40GFPc
					p40GFPx	0.00540147	**
						GFPc
					GFPx	0.219093	ns
						p40LMc
					p40LMx	0.203854	ns

## Sheet: Figure 3c
	pGFP				GFP-p40MET				GFP-p40MET D1374N
	nb cells+	casp 3+			nb cells+	casp 3+			nb cells+	casp 3+
Slide 1	66	6	9.09091		66	25	37.8788		69	7	10.1449
Slide 2	68	2	2.94118		71	24	33.8028		75	6	8
Slide 3	65	3	4.61538		79	20	25.3165		62	5	8.06452
Slide 4	69	6	8.69565		72	23	31.9444		69	5	7.24638
total	268	17			288	92			275	23
Mean			6.33578				32.2356				8.36396
SD			3.0355				5.23644				1.24405
	BAPTA-AM treatment
	pGFP				GFP-p40MET				GFP-p40MET D1374N
	nb cells+	casp 3+			nb cells+	casp 3+			nb cells+	casp 3+
Slide 1	79	10	12.6582		75	8	10.6667		91	13	14.2857
Slide 2	74	4	5.40541		83	14	16.8675		63	5	7.93651
Slide 3	75	11	14.6667		84	9	10.7143		70	5	7.14286
Slide 4	87	4	4.5977
total	315	29			242	31			224	23
Mean			9.332				12.7495				9.78836
SD			5.07787				3.56637				3.91499
		GFP		GFP-p40MET		GFP-p40MET D1374N
		- Bapta	+ Bapta	- Bapta	+ Bapta	- Bapta	+ Bapta
	% Casp3 +	6.33578	9.332	32.2356	12.7495	8.36396	9.78836
	ecart type	3.0355	5.07787	5.23644	3.56637	1.24405	3.91499
	T Test analysis
		9.09091	12.6582	37.8788	10.6667	10.1449	14.2857
		2.94118	5.40541	33.8028	16.8675	8	7.93651
		4.61538	14.6667	25.3165	10.7143	8.06452	7.14286
		8.69565	4.5977	31.9444		7.24638
	GFP -/+ Bapta			0.175094	ns
	GFP-p40MET -/+ Bapta			0.00136051	**
	GFP-p40MET D1374N -/+ Bapta			0.257023	ns

## Sheet: Figure 3d
% of CytchromeC releasing/transfected cells
	GFP		GFP-p40MET		GFP-p40MET D1374N
	control	xestospongine	contrôle	xestospongine	contrôle	xestospongine
Slide 1	3.04433	1.87208	19.0781	6.08254	8.17172	6.52215
Slide 2	8.73031	5.76231	21.97	7.78999	12.4157	8.09189
Slide 3	3.56772	5.89474	19.3663	11.0675	9.85772	11.2799
Mean	5.11412	4.50971	20.1381	8.31333	10.1484	8.63132
SD	2.56595	1.86587	1.30068	2.06846	1.74476	1.97946
									p40GFPc
								p40GFPxesto	0.00119251	**
									GFPc
								GFPxesto	0.400467	ns
									p40LMc
								p40LMxesto	0.230895	ns

## Sheet: Figure 3f
	siCtrl			siMCU				siCtrl			siMCU				siCtrl			siMCU
	GFP	CytC+GFP		GFP	CytC+GFP			p40GFP	CytC+p40		p40GFP	CytC+p40			p40MET-Long-GFP	CytC+p40D1374N		p40MET-Long-GFP	CytC+p40D1374N
1	5	0		5	1			15	2		25	0			9	0		14	1
2	6	0		6	0			15	0		30	2			11	1		9	0
3	6	0		7	0			13	1		19	0			9	1		12	1
4	15	1		10	0			19	3		9	0			10	1		8	0
5	10	0		8	0			16	3		16	1			8	0		7	0
6	12	1		8	0			11	2		16	2			26	0		7	0
7	9	0		11	0			12	2		24	0			8	0		16	0
8	11	0	2.7027	4	0	1.69492		12	1	12.3894	18	0	3.18471		15	0	3.125	6	1	3.79747
9	8	0		3	0			11	1		24	0			9	0		8	0
10	4	1		6	0			15	1		30	1			15	2		10	1
11	6	0		7	0			20	1		16	1			16	0		15	0
12	10	0		7	0			31	2		25	0			15	1		12	0
13	8	0		11	0			12	3		15	1			15	3		6	1
14	11	0		8	0			15	2		20	1			18	0		10	0
15	8	1		6	0			27	2		26	3			24	1		8	0
16	8	0	3.1746	10	0	0		12	1	9.09091	34	2	4.73684		12	0	5.64516	5	0	2.7027
17	5	0		7	0			19	2		8	0			11	2		9	0
18	9	0		6	0			20	0		19	0			15	0		9	0
19	9	0		8	0			9	2		22	0			12	2		10	0
20	6	0		6	0			18	2		20	2			13	0		11	0
21	12	0		6	0			19	2		24	0			19	1		9	0
22	10	0		5	1			19	2		13	0			21	0		8	0
23	7	0		9	0			9	1		24	0			9	0		12	0
24	6	0	0	14	0	1.63934		19	2	9.84848	25	0	1.29032		15	0	4.34783	7	1	1.33333
TOTAL	201	4		178	2			388	40		502	16			335	15		228	6
Mean	8.375	0.166667		7.41667	0.0833333			16.1667	1.66667		20.9167	0.666667			13.9583	0.625		9.5	0.25
% CytoC+		1.99005	1.9591		1.1236	1.11142			10.3093	10.4429		3.18725	3.07063			4.47761	4.37266		2.63158	2.61117
SD			1.39863			0.78622				1.41067			1.40935				1.029			1.00806
	GFP	GFP-p40MET	GFP-p40MET D1374N
	siCTL	siMCU	siCTL	siMCU	siCTL	siMCU
% of CytoC+	1.9591	1.11142	10.4429	3.07063	4.37266	2.61117
SD	1.39863	0.78622	1.41067	1.40935	1.029	1.00806
											GFP+SiCtrl
										GFP+SiMCU	0.248245	ns
											p40MET+SiCtrl
										p40MET+SiMCU	0.00319502	**
											p40long+SiCtrl
										p40long+SiMCU	0.0794011	ns

## Sheet: Figure 3h
lifetime										Relative fluorescence measures
	serie 1		serie 2		serie 3					serie 1		serie 2		serie 3
	CTL	p40	CTL	p40	CTL	p40				CTL	p40MET	CTL	p40MET	CTL	p40MET
	2.5	2.41	2.11	1.89	2.04	1.9				94.2699	122.551	102.602	135.316	129.719	153.614
	2.51	2.45	2.1	1.89	2.18	2.05				91.1275	109.982	104.089	135.316	105.823	128.012
	2.5	2.41	2.11	1.9	2.21	1.88				94.2699	122.551	102.602	133.829	100.703	157.028
	2.56	2.42	2.19	1.88	2.43	1.67				75.4159	119.409	90.7063	136.803	63.1526	192.871
	2.41	2.4		2.01	2.37	1.88				122.551	125.693		117.472	73.3936	157.028
	2.39	2.5		1.85	2.49	1.88				128.835	94.2699		141.264	52.9116	157.028
	2.47	2.4		2.02	1.9	2.06				103.697	125.693		115.985	153.614	126.305
	2.46	2.45		2.02	1.91	2.1				106.839	109.982		115.985	151.908	119.478
	2.45	2.46		2	2.32	2.21				109.982	106.839		118.959	81.9277	100.703
	2.56	2.41		2	2.29	2.24				75.4159	122.551		118.959	87.0482	95.5823
	2.49	2.31		2.01	2.22	2.1				97.4122	153.974		117.472	98.996	119.478
	2.52	2.42		1.97	2.25	2.38				87.9852	119.409		123.42	93.8755	71.6867
	2.47	2.31			2.09	2.4				103.697	153.974			121.185	68.2731
	2.49	2.32			2.05	2.1				97.4122	150.832			128.012	119.478
	2.45	2.42			2.16	1.91				109.982	119.409			109.237	151.908
	2.45	2.5			2.38	1.94				109.982	94.2699			71.6867	146.787
	2.51	2.38			2.35	1.92				91.1275	131.978			76.8072	150.201
		2.47				2.19					103.697				104.116
		2.46				2.24					106.839				95.5823
						1.71									186.044
						1.79									172.39
E FRET
	0.107143	0.139286	0.246429	0.325	0.271429	0.321429			mean	100	120.732	100	125.898	100	132.076
	0.103571	0.125	0.25	0.325	0.221429	0.267857
	0.107143	0.139286	0.246429	0.321429	0.210714	0.328571
	0.0857143	0.135714	0.217857	0.328571	0.132143	0.403571				CTL	p40MET
	0.139286	0.142857		0.282143	0.153571	0.328571				100	120.732
	0.146429	0.107143		0.339286	0.110714	0.328571				100	125.898
	0.117857	0.142857		0.278571	0.321429	0.264286				100	132.076
	0.121429	0.125		0.278571	0.317857	0.25
	0.125	0.121429		0.285714	0.171429	0.210714			mean	100	126.235
	0.0857143	0.139286		0.285714	0.182143	0.2			SD	1.64093e-14	4.63743
	0.110714	0.175		0.282143	0.207143	0.25
	0.1	0.135714		0.296429	0.196429	0.15				T-Test	0.0013235
	0.117857	0.175			0.253571	0.142857					**
	0.110714	0.171429			0.267857	0.25
	0.125	0.135714			0.228571	0.317857
	0.125	0.107143			0.15	0.307143
	0.103571	0.15			0.160714	0.314286
		0.117857				0.217857
		0.121429				0.2
						0.389286
						0.360714
mean	0.113655	0.137218	0.240179	0.302381	0.209244	0.276361

## Sheet: Figure 3i
% of CytchromeC releasing/transfected cells
	GFP	GFP-p40MET	GFP-p40MET D1374N
	GFP		GFP-p40MET		GFP-MET D1374N
	control	CSA	control	CSA	control	CSA
Slide 1	3.37838	5.6	18.1818	7.29927	4.28571	6.32911
Slide 2	5.49451	1.45985	14.0351	4.51128	4.0404	3.38983
Slide 3	2.21239	4.1958	16.129	5.82011	3.125	1.51515
Slide 4	8.13008	5.71429	22.2222	12.069	4.41989	4.43038
Slide 5	5.40541	6.80628	27.2727	9.52381	6.49351	7.78443
Slide 6	2.85714	4.78723	26.6272	7.14286	7.58621	7.08661
Mean	4.57965	4.76058	20.7447	7.72771	4.99179	5.08925
SD	2.00576	1.68392	5.03809	2.46923	1.5385	2.1942
						p40GFPc
					p40GFPx	0.000204225	***
						GFPc
					GFPx	0.440153	ns
						p40MET D1374Nc
					p40MET D1374Nx	0.468393	ns
