# Supplementary material for: Control of cell death/survival balance by the MET dependence receptor
Source: eLife. 2020 Feb 24;9:e50041. doi: 10.7554/eLife.50041 (PMC7039684; doi:10.7554/eLife.50041)
Supplement: Figure 4—figure supplement 1—source data 1. [file elife-50041-fig4-figsupp1-data1.xlsx]

## Sheet: Feuil1
		wt								heterozygous (WT/D1374N)								homozygous (D1374N)
		Slide 1		Slide 2		Slide 3		Slide 4		Slide 1		Slide 2		Slide 3		Slide 4		Slide 1		Slide 2		Slide 3		Slide 4
		caspase 3+/field	Nb of cells/field	caspase 3+/field	Nb of cells/field	caspase 3+/field	Nb of cells/field	caspase 3+/field	Nb of cells/field	caspase 3+/field	Nb of cells/field	caspase 3+/field	Nb of cells/field	caspase 3+/field	Nb of cells/field	caspase 3+/field	Nb of cells/field	caspase 3+/field	Nb of cells/field	caspase 3+/field	Nb of cells/field	caspase 3+/field	Nb of cells/field	caspase 3+/field	Nb of cells/field
		5	5	3	8	5	17	4	11	4	12	8	13	8	26	2	21	1	20	3	11	4	9	1	11
		0	13	4	8	6	12	2	15	7	13	3	14	0	17	2	18	1	16	5	12	0	5	1	15
		3	8	6	13	7	14	4	14	3	9	6	13	2	19	1	16	0	10	2	16	0	6	2	18
		4	14	3	8	2	16	4	14	6	13	3	10	5	17	2	15	4	18	3	15	4	13	1	12
		0	18	2	9	4	12	4	15	5	13	4	12	3	16	4	17	3	13	1	11	1	15	2	11
		3	19	4	10	5	13	4	22	5	16	3	8	5	14	2	15	2	23	1	9	0	16	2	18
		2	5	4	10	6	16	7	21	3	10	7	18	3	19	1	17	1	12	1	16	1	10	3	14
		5	9	4	7	2	11	7	22	2	6	5	13	3	16	3	14	2	14	2	12	3	11	5	13
		5	13	1	7	5	11	6	13	6	13	7	12	4	21	3	16	4	29	1	12	0	17	4	19
		1	9	7	14	5	15	4	13	4	20	5	13	5	17	3	17	4	16	2	11	0	10	0	14
	total	28	113	38	94	47	137	46	160	45	125	51	126	38	182	23	166	22	171	21	125	13	112	21	145
	% of casp3+		24.7788		40.4255		34.3066		28.75		36		40.4762		20.8791		13.8554		12.8655		16.8		11.6071		14.4828
							total	159	504							157	599							77	553
							% of Casp3+ cells		31.5476								26.2104								13.9241
							SD		5.89495								10.8429								1.94107
		MEFs		wt	wt/D1374N	D1374N
			Caspase-3 positive cells	31.5476	26.2104	13.9241
				5.89495	10.8429	1.94107
			T-Test	0.285788	0.00115683	0.0360328
				wt vs het	wt vs D1374N	het vs D1374N
				ns	**	*
