# Supplementary material for: Control of cell death/survival balance by the MET dependence receptor
Source: eLife. 2020 Feb 24;9:e50041. doi: 10.7554/eLife.50041 (PMC7039684; doi:10.7554/eLife.50041)
Supplement: Figure 5—source data 1. [file elife-50041-fig5-data1.xlsx]

## Sheet: Figure 5c
											WT-A	WT-B	D1374N-A	D1374N-B
% of Cleaved Casp3 positive cells/transfected cells
		WT A		WT B		D1374N-A		D1374N-B
		Control	STS	Control	STS	Control	STS	Control	STS
	Slide 1	0.0143369	0.219101	0.00591716	0.171806	0.00302115	0.0296053	0	0.0423077
	Slide 2	0.0239726	0.171141	0.0236967	0.134715	0	0.0311284	0.00806452	0.0609756
	Slide 3	0.0027248	0.208556	0.015444	0.179283	0	0.023166	0.00609756	0.0470588
	Slide 4	0.0160772	0.193651	0.0195312	0.149254	0	0.0185874	0	0.0434783
	Slide 5	0.013587	0.19305	0.00735294	0.0851064	0	0.0332103	0.00352113	0.044586
	Slide 6	0.00311526	0.152466	0.0273438	0.138365	0.00480769	0.0162602	0.00454545	0.0533808
	Mean	1.23023	18.9661	1.65476	14.3088	0.130481	2.53263	0.370478	4.86312
	SD	0.744274	2.2277	0.790922	3.06243	0.191599	0.640842	0.296996	0.658684
	T-TEST		5.57718e-09		2.1841e-06		5.69446e-06		3.61762e-08
			***		***		***		***
				WT A
			D1374N-A	1.02672e-08	***
			D1374N-B	2.2941e-09	***
				WT B
			D1374N-A	3.76551e-06	***
			D1374N-B	2.54404e-05	***

## Sheet: Figure 5d
											WT-A	WT-B	D1374N-A	D1374N-B
% of Cleaved Casp3 positive cells/transfected cells
		WT A		WT B		D1374N-A		D1374N-B
		STS	STS + xesto	STS	STS + xesto	STS	STS + xesto	STS	STS + xesto
	Slide 1	22.2527	11.3433	16.6065	4.53333	5.95611	9.69388	6.98254	9.51374
	Slide 2	17.1512	15.1007	11.0119	5.43933	4.37318	8.73016	8.18182	8.65922
	Slide 3	20.3125	6.53846	10.1828	7.33696	6.98413	7.03125	8.59031	5.67164
	Mean	19.9055	10.9941	12.6004	5.76987	5.77114	8.4851	7.91822	7.9482
	SD	2.10251	3.50422	2.8529	1.1682	1.07391	1.10074	0.682319	1.64714
	T-Test		0.0183961		0.0175343		0.0335333		0.491084
			*		*		*		ns

## Sheet: Figure 5f
Experiment number	Stop of Ca++ uptake(µM of injected calcium )
	WT	D1374N
Exp 1-LD269	90	150
Exp2-LD341	/	130
Exp3-LD327	110	140
	110	/
Exp4-LD332	100	130
	100	140
Mean	102	138
SD	7.48331	7.48331
	student test	6.86759e-05	***
