# Supplementary material for: Control of cell death/survival balance by the MET dependence receptor
Source: eLife. 2020 Feb 24;9:e50041. doi: 10.7554/eLife.50041 (PMC7039684; doi:10.7554/eLife.50041)
Supplement: Figure 6—source data 1. [file elife-50041-fig6-data1.xlsx]

## Sheet: Figure 6e
	Mice ID	WT mice		Mice ID	D1374N mice
serie 1	395	0.1129	+++	423	0.00336	-						Caspase 3 staining score
	396	0.1376	+++	424	0.049834	+
	397	0.1319	+++	427	0.005534	-						-	+	++	+++	Total
	441	0.0431	+	428	0.0372	+				WT	Serie 1	0	3	0	4	7
	442	0.142147	+++	429	0.028687	+					Serie 2	1	0	1	4	6
	460	0.021	+	430	0.004541	-					Total	1	3	1	8	13
	465	0.037	+	431	0.004454	-					% in each group	7.69231	23.0769	7.69231	61.5385	100
serie 2	470	0.102975	+++	472	0.375466	+++					% of all positive		92.3077
	493	0.001545	-	474	0.202383	+++
	494	0.40813	+++	476	0.139788	+++				D1374N	Serie 1	4	3	0	0	7
	495	0.426	+++	477	0.000507	-					Serie 2	3	0	1	4	8
	496	0.088868	++	478	0.16907	+++					Total	7	3	1	4	15
	497	0.296551	+++	479	0.002532	-					% in each group	46.6667	20	6.66667	26.6667	100
				480	0.002277	-					% of all positive		53.3333
				481	0.070214	++
								Fisher Test					Ho: Variables x and y are independent. So whether or not being mutated has nothing to do with the rate of liver apoptosis.
									-	+
								WT	1	12	13
								KI	7	8	15			a+bCa =	13	NCa+c =	3108105
									8	20	28			c+dCc =	6435
											p-value : 0.035697940503433				Fisher Test	p=	0.0269151
																	p<0.05	HO is rejected
																		= the mutation D1374N affect apoptotic response of the liver
									a	b	a+b
									c	d	c+d
									a+c	b+d	N

## Sheet: Figure 6f
	WT mice				D1374N mice				WT				D1374N mice
	Mice ID	ALAT (U/I)	ALAT % of increase		Mice ID	ALAT (U/I)	ALAT % of increase		Mice ID	ASAT (U/I)	ASAT % of increase		Mice ID	ASAT (U/I)	ASAT % of increase
	594	0.902961	-9.70387		174	0.812782	-18.7218		594	2.08626	108.626		174	1.20015	20.0146
	348	1.05952	5.95227		172	1.01179	1.17883		348	3.2136	221.36		199	1.62618	62.6175
	599	1.20131	20.1305		597	1.0645	6.44956		600	3.80529	280.529		597	1.89519	89.519
	189	2.40896	140.896		199	1.18164	18.164		595	3.90739	290.739		172	1.99012	99.0122
	595	2.41126	141.126		186	1.32527	32.5269		599	4.40858	340.858		173	2.18121	118.121
	347	2.46899	146.899		173	1.61815	61.815		347	4.9546	395.46		186	2.28491	128.491
	600	2.56896	156.896		188	1.89788	89.788		343	7.49882	649.882		188	7.77513	677.513
	191	3.01723	201.723		596	3.62044	262.044		598	13.4507	1245.07		596	14.331	1333.1
	593	3.68626	268.626		175	11.281	1028.1		593	15.1066	1410.66		175	18.2108	1721.08
	598	4.1545	315.45		187	27.6033	2660.33		344	29.1842	2818.42		198	40.8273	3982.73
	190	4.54783	354.783		198	43.46	4246		88	4.67242	367.242		90	47.9218	4692.18
	88	5.36726	436.726		90	58.1162	5711.62		127	8.96916	796.916		187	48.0096	4700.96
	343	6.8863	588.63		200	69.4738	6847.38		191	3.48077	248.077		200	55.7866	5478.66
	127	7.02463	602.463						190	3.85086	285.086
	103	7.4056	640.56						103	4.86254	386.254
	344	11.684	1068.4						189	6.12395	512.395
	152	29.1995	2819.95						152	48.4346	4743.46
Without Mice ID
	WT	ALAT % of increase			D1374N	ALAT % of increase			WT	ASAT % of increase			D1374N	ASAT % of increase
	1	-9.70387			1	-18.7218			1	108.626			1	20.0146
	2	5.95227			2	1.17883			2	221.36			2	62.6175
	3	20.1305			3	6.44956			3	248.077			3	89.519
	4	140.896			4	18.164			4	280.529			4	99.0122
	5	141.126			5	32.5269			5	285.086			5	118.121
	6	146.899			6	61.815			6	290.739			6	128.491
	7	156.896			7	89.788			7	340.858			7	677.513
	8	201.723			8	262.044			8	367.242			8	1333.1
	9	268.626			9	1028.1			9	386.254			9	1721.08
	10	315.45			10	2660.33			10	395.46			10	3982.73
	11	354.783			11	4246			11	512.395			11	4692.18
	12	436.726			12	5711.62			12	649.882			12	4700.96
	13	588.63			13	6847.38			13	796.916			13	5478.66
	14	602.463							14	1245.07
	15	640.56							15	1410.66
	16	1068.4							16	2818.42
	17	2819.95							17	4743.46
		ALAT (U/I)		ASAT (U/I)
		WT	D1374N	WT	D1374N
	<50% increase	3	5	0	1
	50-100% increase	0	2	0	3
	>100% increase	14	6	17	9
	total	17	13	17	13
	Fisher Test					Ho: Variables x and y are independent. So whether or not being mutated has nothing to do with the rate of liver apoptosis.
	ALAT	inf to 100%	sup to 100%					ASAT	inf to 100%	sup to 100%
	WT	3	14	17				WT	0	17	17
	KI	8	5	13				KI	4	9	13
		11	19	30					4	26	30
								a+bCa =	1	NCa+c =	27405
								c+dCc =	715
		a	b	a+b					Fisher test	p=	0.0260901
		c	d	c+d							p<0.05	HO is rejected
		a+c	b+d	N
	a+bCa =	680	NCa+c =	5.46273e+07
	c+dCc =	1287
		Test de Fisher	p=	0.0160206
				p<0.05	HO is rejected	= The mutation affects asat/alat levels after treatment with the Jo2 agonist.
